# Supplementary material for: Achieving extraordinary enhanced reversible capacitance through the synergy between octahedral structure and isovalent ionic doping
Source: Royal Society of Chemistry journal article supplement (doi:10.1039/d2ta02937e), 2022-01-01
Supplement: d2ta02937e1.pdf [file d2ta02937e1.pdf]

## Supporting Information

### Achieving extraordinary enhanced reversible capacitance through the synergy between octahedral structure and isovalent ionic doping

By Minghua Chen\*, Zhen Zhao, Junfeng Zhao, Qian Liu, Jiawei Zhang, Yuqing Wang, Yu Li\*

Key Laboratory of Engineering Dielectric and Applications (Ministry of Education),  
School of Electrical and Electronic Engineering, Harbin University of Science and  
Technology, Harbin 150080, P. R. China

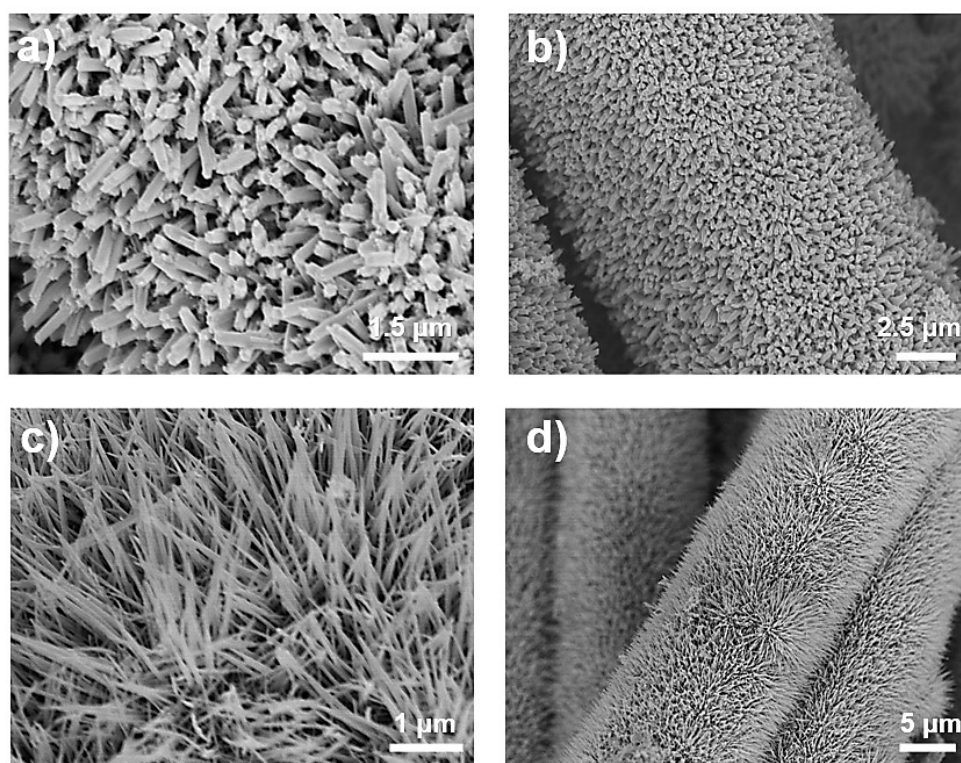

**Figure S1.** (a, b) SEM images of 1% Co-doped WN nanorods, (c, d) SEM images of

20% Co-doped WN nanowires.

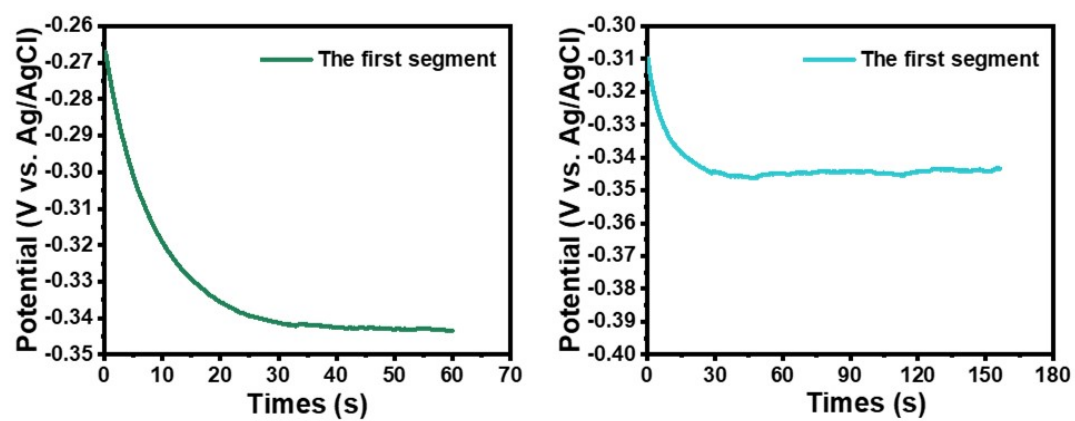

**Figure S2.** More negative potentials at -0.35V and -0.4V

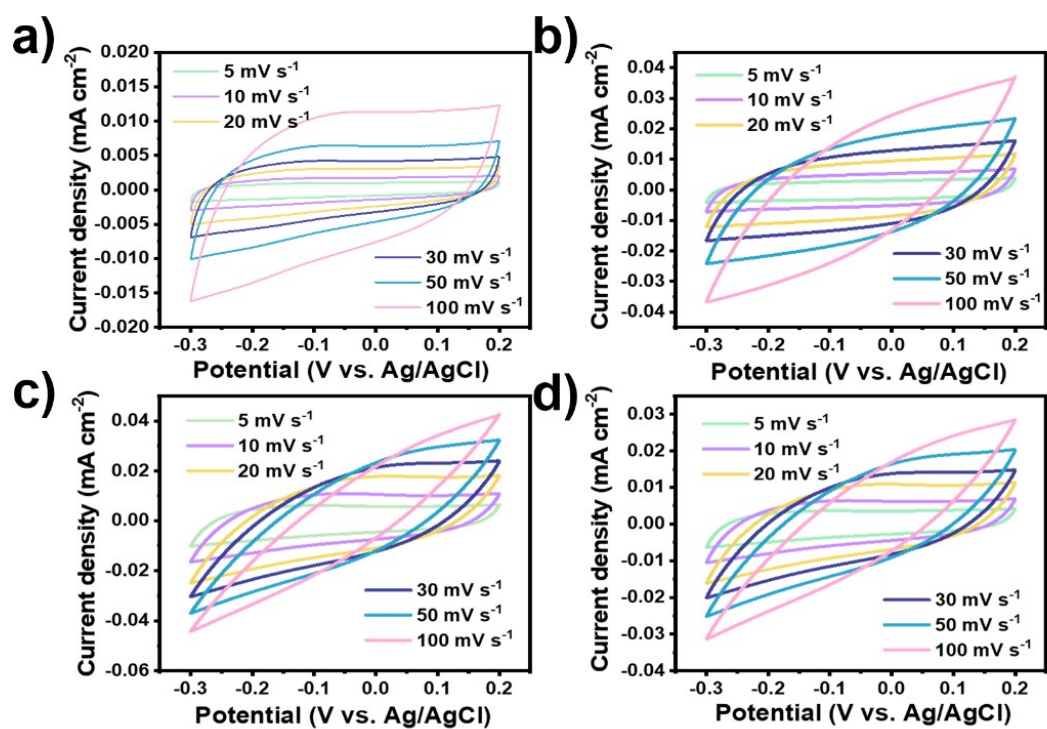

**Figure S3.** (a-d) CV curves of pure WN, 1% Co-doped WN, 5% Co-doped WN and 20% Co-doped WN samples at different scanning rates from 5 to 100 mV s<sup>-1</sup>.

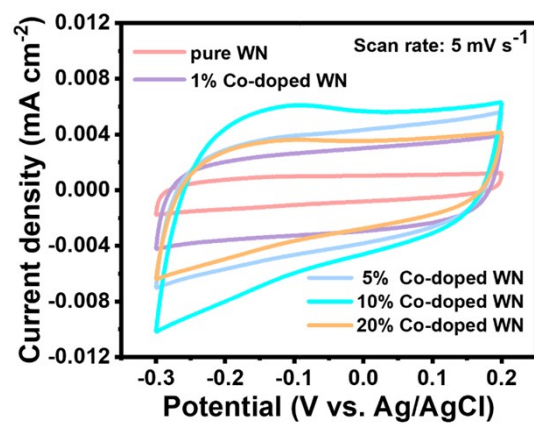

**Figure S4.** The CV curves of different samples at the scan rate of 5 mV s<sup>-1</sup>

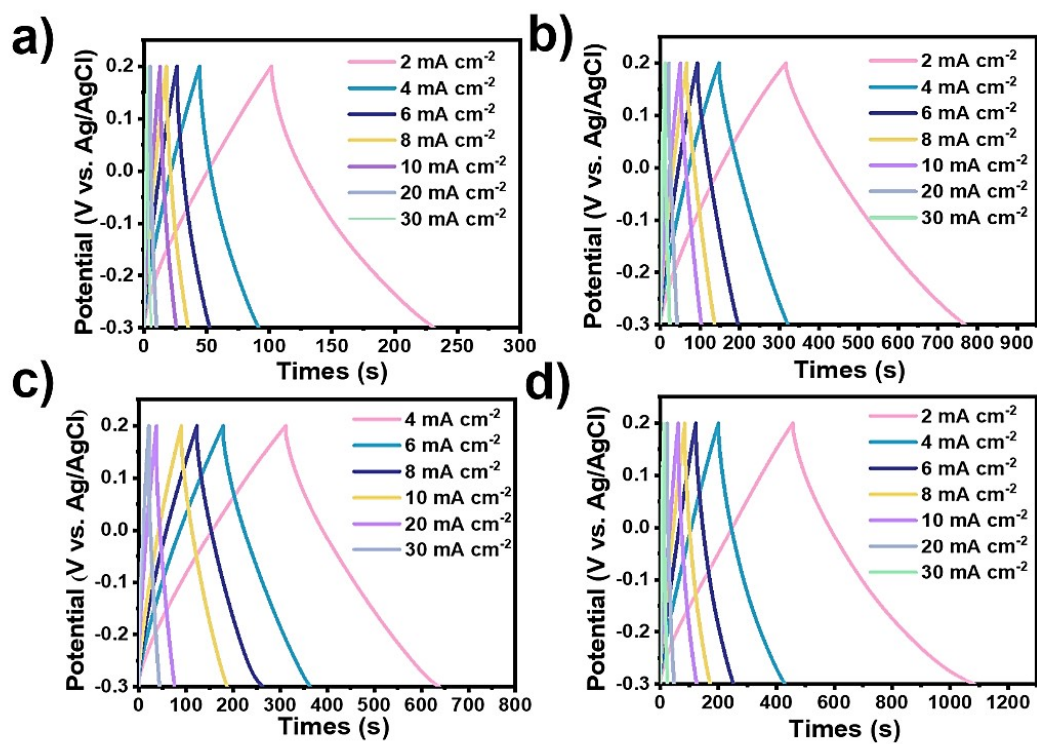

**Figure S5.** (a-d) GCD curves of pure WN, 1% Co-doped WN, 5% Co-doped WN and 20% Co-doped WN samples at various current density.

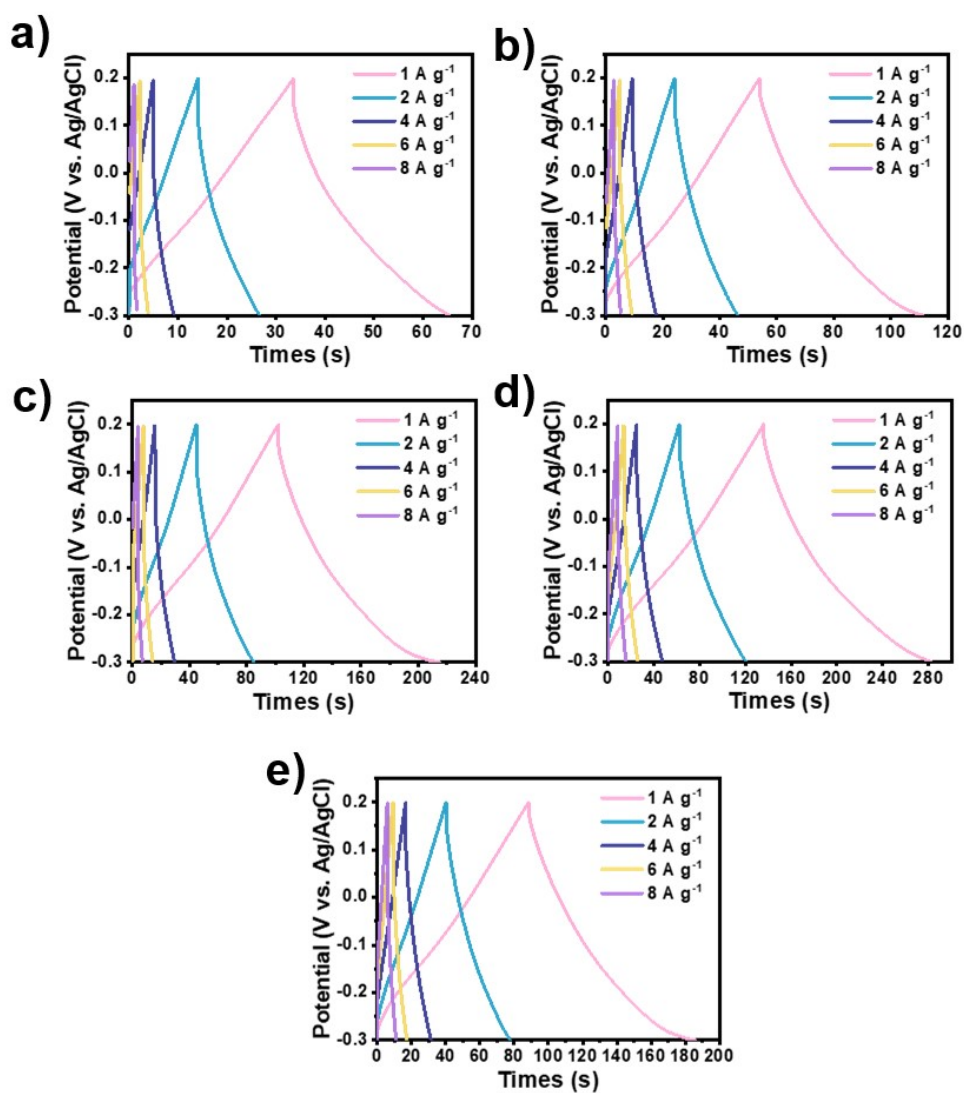

**Figure S6.** The mass-specific capacitance of a) WN, b) 1% Co-doped WN, c) 5% Co-doped WN, d) 10% Co-doped WN and e) 20% Co-doped WN samples.

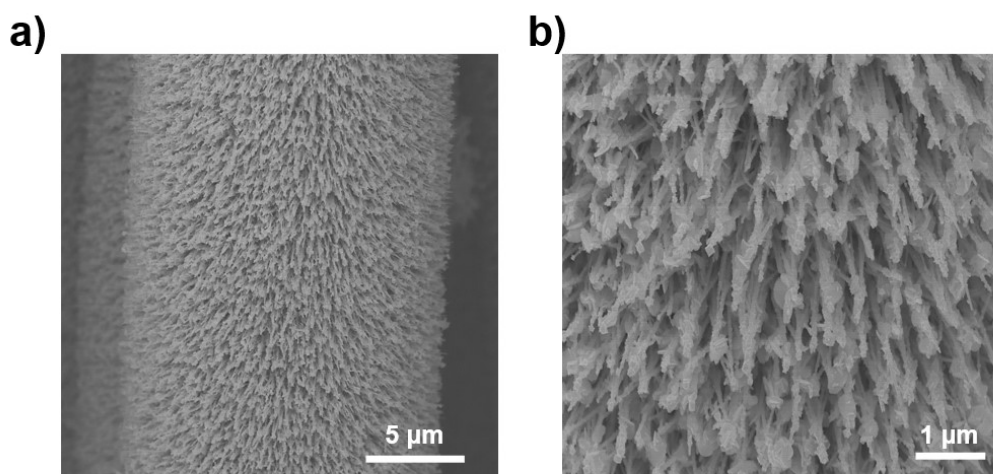

**Figure S7.** SEM images of the 10% Co-doped WN@CC sample after 10,000 cycles:

a) a low-magnification image, b) a high-magnification image.



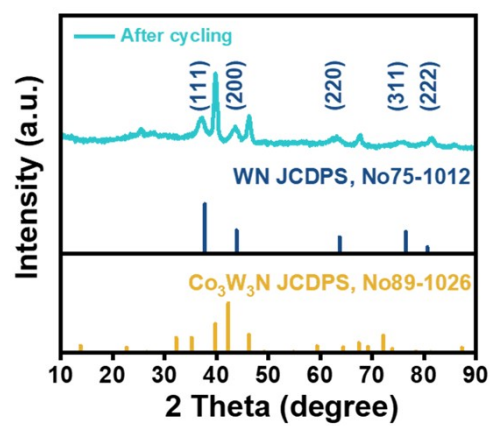

**Figure S8.** XRD pattern of the 10% Co-doped WN@CC sample after 10,000 cycles

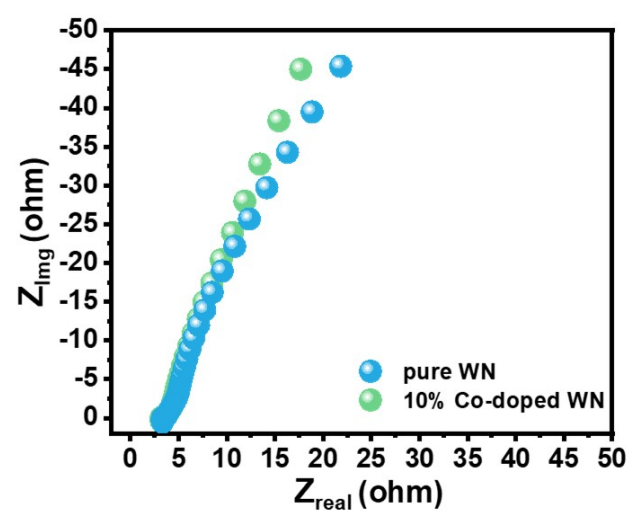

**Figure S9.** EIS of pure WN and 10% Co-doped WN.

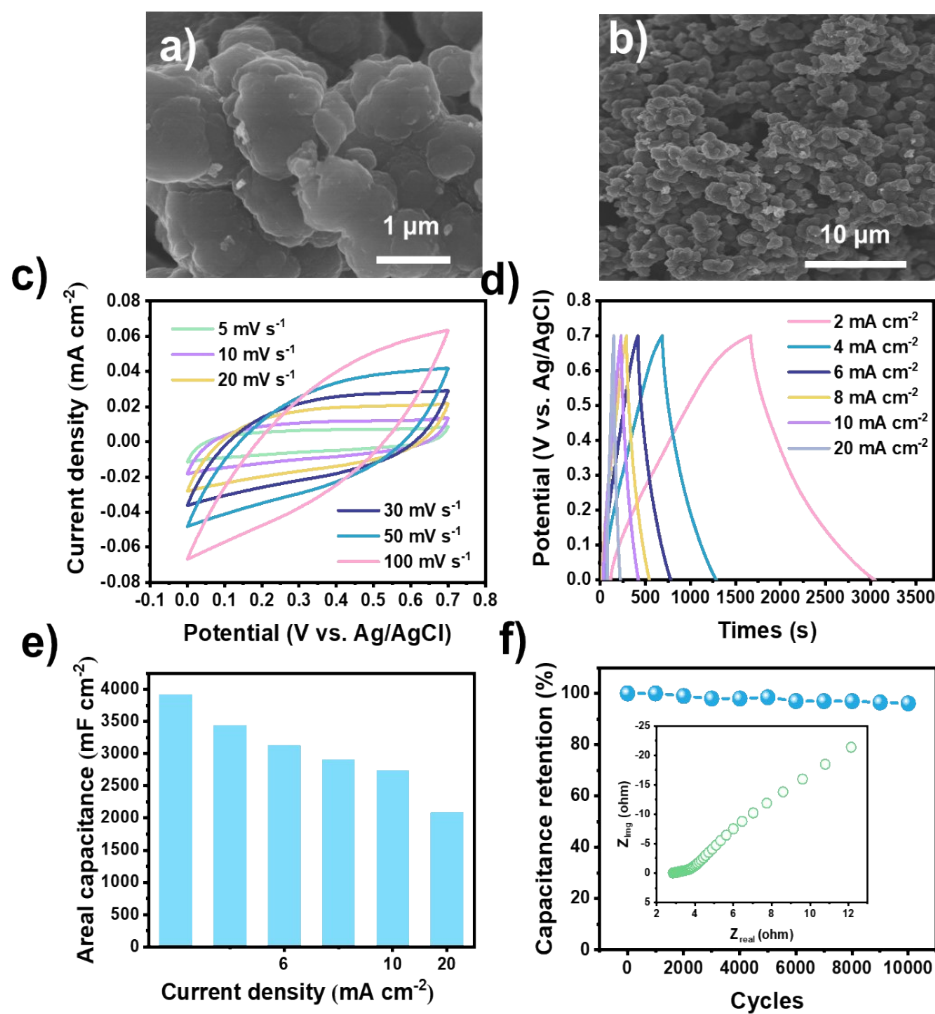

**Figure S10.** Electrochemical characterizations of PPy@CC electrode: a,b) SEM images of PPy@CC. c,d) CV and GCD curves at different scan rates and current densities, respectively. e) The areal capacitance of PPy@CC electrode. f) Cycling stability over 10,000 cycles at a current density of 60  $\text{mA cm}^{-2}$  of PPy@CC electrode; inset shows the typical Nyquist plot.

**Table S1.** Comparison of Co/W atomic percent for 10% Co-doped WN sample, after  
500 cycles and after 10,000 cycles

| <b>10% Co-doped WN sample</b> | <b>Co/W atomic percent</b> |
|-------------------------------|----------------------------|
| Before cycling                | 3.5%                       |
| After 500 cycles              | 3.32%                      |
| After 10,000 cycles           | 3.73%                      |
